# Supplementary material for: Functional Analysis and Genome Mining Reveal High Potential of Biocontrol and Plant Growth Promotion in Nodule-Inhabiting Bacteria Within Paenibacillus polymyxa Complex
Source: Front Microbiol. 2021 Jan 18;11:618601. doi: 10.3389/fmicb.2020.618601 (PMC7848036; doi:10.3389/fmicb.2020.618601)
Supplement: Supplementary file 1 [file Table_1.xlsx]

## Sheet: Sheet1
Table S1. Genes or products of biosynthesis identified from genomes of strains belonging to genus Paenibacillus
Organism (NCBI taxonomy)	Strain	Genome assembly	Fusaricidin	Siderophore	Nitrogenase	ilvB (=ipdC)	ACC deaminase
Paenibacillus polymyxa	ATCC 842T	GCA_000217775.1	1	0	0	1	0
Paenibacillus polymyxa	YC0573	GCA_001874425.3	1	1	1	1	0
Paenibacillus polymyxa	ATCC 15970	GCA_001922145.1	1	1	1	1	0
Paenibacillus polymyxa	J	GCA_001719045.1	1	1	1	1	0
Paenibacillus polymyxa	HY96-2	GCA_002893885.1	1	0	0	1	0
Paenibacillus polymyxa	ZF129	GCA_006274405.1	1	0	0	1	0
Paenibacillus polymyxa	YC0136	GCA_001874405.3	1	1	1	1	0
Paenibacillus polymyxa	Sb3-1	GCA_000819665.1	1	0	1	1	0
Paenibacillus polymyxa	ZF197	GCA_007858415.1	1	0	1	1	0
Paenibacillus polymyxa	CF05	GCA_000785455.1	1	0	0	1	0
Paenibacillus polymyxa	NCTC10343	GCA_900454525.1	1	0	0	1	0
Paenibacillus polymyxa	IIF5SW-B3	GCA_013346085.1	1	0	0	1	0
Paenibacillus polymyxa	IIF8SW-P5	GCA_013346015.1	1	0	0	1	0
Paenibacillus polymyxa	IIF5SW-B4	GCA_013345675.1	1	0	0	1	0
Paenibacillus polymyxa	IIF2*SW-P4	GCA_013345725.1	1	0	0	1	0
Paenibacillus polymyxa	IIF2*SW-P2	GCA_013345925.1	1	0	0	1	0
Paenibacillus polymyxa	IIF8SW-P4	GCA_013346045.1	1	0	0	1	0
Paenibacillus polymyxa	IIF2SW-B2	GCA_013346055.1	1	0	0	1	0
Paenibacillus polymyxa	CICC 10580	GCA_000735775.1	1	0	0	1	0
Paenibacillus polymyxa	OSY-EC	GCA_012933405.1	1	0	0	1	0
Paenibacillus polymyxa	IIF8SW-B4	GCA_013346005.1	1	0	0	1	0
Paenibacillus polymyxa	EBL06	GCA_000955925.1	1	0	0	1	0
Paenibacillus polymyxa	KP10	GCA_003052505.1	1	0	0	1	0
Paenibacillus polymyxa	IIF8SW-P3	GCA_013345985.1	1	0	0	1	0
Paenibacillus polymyxa	DSM 292	GCA_900406265.2	1	1	1	1	0
Paenibacillus polymyxa	KCCM 40454	GCA_002894925.1	1	0	0	1	0
Paenibacillus polymyxa	TH2H2	GCA_003813765.1	1	0	0	1	0
Paenibacillus polymyxa	KF-1	GCA_001481575.1	1	0	0	1	0
Paenibacillus polymyxa	CETEM	GCA_010692785.1	1	0	0	1	0
Paenibacillus polymyxa	CFSAN034343	GCA_001707685.1	1	1	1	1	0
Paenibacillus polymyxa	DSM 365	GCA_000714835.1	1	0	1	1	0
Paenibacillus polymyxa	ND25	GCA_001662815.1	1	0	0	1	0
Paenibacillus polymyxa	DCB2-2	GCA_003971075.1	1	0	0	1	0
Paenibacillus polymyxa	LY214	GCA_002916985.1	1	1	1	1	0
Paenibacillus polymyxa	ND24	GCA_001663585.1	1	0	1	1	0
Paenibacillus polymyxa	NRRL B-30509	GCA_000943535.1	1	0	0	1	0
Paenibacillus polymyxa	NCTC7575	GCA_900454545.1	1	0	0	1	0
Paenibacillus polymyxa	TF07-21-d	GCA_003437195.1	1	0	0	1	0
Paenibacillus polymyxa	MGYG-HGUT-03687	GCA_902399875.1	0	0	0	1	0
Paenibacillus polymyxa	CFSAN034341	GCA_001709075.1	1	0	1	1	0
Paenibacillus polymyxa	CCI-25	GCA_001593085.1	1	1	1	1	0
Paenibacillus polymyxa	CFSAN034342	GCA_001709135.1	1	1	1	1	0
Paenibacillus polymyxa	WLY78	GCA_000463565.1	1	0	1	1	0
Paenibacillus polymyxa	PIC73	GCA_005217485.1	1	0	0	1	0
Paenibacillus polymyxa	3A-25AI	GCA_009650715.1	1	0	0	1	0
Paenibacillus polymyxa	YUPP-8	GCA_001277855.1	1	1	0	1	0
Paenibacillus polymyxa	1-43	GCA_000520795.1	1	0	1	1	0
Paenibacillus polymyxa	A18	GCA_000809185.2	1	0	0	1	0
Paenibacillus polymyxa	CR1	GCA_000507205.2	0	1	1	1	0
Paenibacillus polymyxa	E681	GCA_000146875.2	1	0	0	1	0
Paenibacillus polymyxa	M1	GCA_000237325.1	1	0	0	1	0
Paenibacillus polymyxa	OSY-DF	GCA_000265445.1	1	0	0	1	0
Paenibacillus polymyxa	SC2	GCA_000164985.2	1	0	0	1	0
Paenibacillus polymyxa	SQR21	GCA_000597985.1	1	0	0	1	0
Paenibacillus polymyxa	TD94	GCA_000520775.1	1	1	1	1	0
Paenibacillus jamilae (synonym P. polymyxa)	NS115	GCA_001477135.1	1	0	1	1	0
Paenibacillus jamilae (synonym P. polymyxa)	KACC 10925	GCA_003428495.1	1	0	0	1	0
Paenibacillus jamilae (synonym P. polymyxa)	CN9	GCA_001619755.1	1	0	1	1	0
Paenibacillus peoriae	KCTC 3763T	GCA_000236805.2	1	1	0	1	0
Paenibacillus peoriae	HS311	GCA_001272655.2	1	1	1	1	0
Paenibacillus peoriae	FSL R7-0131	GCA_001956225.1	1	1	1	1	0
Paenibacillus peoriae	FSL R7-0321	GCA_001956235.1	1	0	1	1	0
Paenibacillus peoriae	IBSD35	GCA_002937395.1	1	0	1	1	0
Paenibacillus peoriae	FSL J3-0120	GCA_001956155.1	1	1	1	1	0
Paenibacillus peoriae	FSL A5-0030	GCA_001955935.1	1	1	1	1	0
Paenibacillus peoriae	FSL H8-0551	GCA_001956115.1	1	1	1	1	0
Paenibacillus kribbensis	AM49T	GCA_002240415.1	1	1	1	1	0
Paenibacillus kribbensis	PS04	GCA_013394225.1	1	1	1	1	0
Paenibacillus kribbensis	6hRe76	GCA_001705305.1	1	0	1	1	0
Paenibacillus ottowii	MS2379T	GCA_006874425.1	1	0	0	1	0
Paenibacillus brasilensis	KACC 13842	GCA_009363115.1	1	0	1	1	0
Paenibacillus terrae	HPL-003	GCA_000235585.1	0	1	1	1	0
Paenibacillus terrae	GHS.8NWYW.5	GCA_008271705.1	1	1	0	1	0
Paenibacillus terrae	NRRL B-30644	GCA_000943545.1	1	1	0	1	0
Paenibacillus terrae	PIC167	GCA_005217525.1	1	1	0	1	0
"Paenibacillus maysiensis"	1-49T	GCA_000520815.1	1	1	1	1	0
Paenibacillus elgii	NBRC 100335T=LMG 24465T	GCA_004000865.1	1	0	0	1	0
Paenibacillus elgii	SWL-W8	GCA_010894335.1	1	0	0	1	0
Paenibacillus elgii	AC13	GCA_003057575.1	1	0	0	1	0
Paenibacillus elgii	M63	GCA_001619725.1	1	0	0	1	0
Paenibacillus elgii	B69	GCA_000213315.2	1	0	0	1	0
Paenibacillus tianmuensis	CGMCC 1.8946T	GCA_900100345.1	1	0	0	1	0
Paenibacillus tyrfis	MSt1T	GCA_000722545.1	1	0	0	1	0
Paenibacillus tyrfis	SUK123	GCA_900188505.1	1	0	0	1	0
Paenibacillus ehimensis	NBRC 15659T	GCA_004000785.1	0	1	0	1	0
Paenibacillus ehimensis	A2	GCA_000612225.1	0	1	0	1	0
Paenibacillus bovis	BD3526T	GCA_001421015.2	1	0	0	1	0
Paenibacillus bovis	DE0126	GCA_007679095.1	0	0	0	1	0
Paenibacillus wulumuqiensis	Y24T	GCA_000971965.1	1	0	0	1	0
Paenibacillus massiliensis	DSM 16942T	GCA_000377505.1	1	1	0	1	0
Paenibacillus massiliensis	T7	GCA_000520695.1	1	1	1	1	0
Paenibacillus alvei	DSM 29T	GCA_000293805.1	1	0	0	1	0
Paenibacillus alvei	MP1	GCA_011009465.1	1	0	0	1	0
Paenibacillus alvei	JR949	GCA_013116635.1	1	0	0	1	0
Paenibacillus alvei	B-LR1	GCA_900519125.1	0	0	0	1	0
Paenibacillus alvei	bk032014	GCA_013346325.1	0	0	0	1	0
Paenibacillus alvei	A6-6i-x	GCA_000442535.1	0	0	0	1	0
Paenibacillus alvei	TS-15	GCA_000442555.1	0	0	0	1	0
Paenibacillus aceris	KACC 19194	GCA_011605705.1	0	1	0	1	0
Paenibacillus aceti	L14	GCA_003614185.1	0	0	0	1	0
Paenibacillus agaridevorans	T-3040	GCA_003112455.1	0	0	0	1	0
Paenibacillus albus	18JY67-1	GCA_003952225.1	0	0	0	1	0
Paenibacillus alginolyticus	DSM 5050	GCA_000422905.1	0	0	0	1	0
Paenibacillus algorifonticola	XJ259	GCA_000971975.1	0	0	0	1	0
Paenibacillus algorifonticola	CGMCC 1.10223	GCA_900112925.1	0	1	0	1	0
Paenibacillus amylolyticus	Heshi-A3	GCA_001570725.1	0	1	0	1	0
Paenibacillus amylolyticus	NBRC 15957	GCA_004001025.1	0	1	0	1	0
Paenibacillus amylolyticus	S-B4	GCA_004358835.1	0	1	0	1	0
Paenibacillus amylolyticus	FSL H7-0692	GCA_001956035.1	0	1	0	1	0
Paenibacillus amylolyticus	Pamy_1	GCA_900095775.1	0	1	0	1	0
Paenibacillus amylolyticus	FSL J3-0122	GCA_001956175.1	0	1	0	1	0
Paenibacillus amylolyticus	FSL F4-0260	GCA_001955995.1	0	1	0	1	0
Paenibacillus amylolyticus	27C64	GCA_003719335.1	0	1	0	1	0
Paenibacillus amylolyticus	FSL H8-0246	GCA_001956055.1	0	1	0	1	0
Paenibacillus anaericanus	DSM 15890	GCA_003994475.1	0	0	1	1	0
Paenibacillus antarcticus	KACC 11469	GCA_008369725.1	0	0	0	1	0
Paenibacillus antarcticus	CECT 5836	GCA_001637225.1	0	0	0	1	0
Paenibacillus antibioticophila	GD11	GCA_000455265.1	0	0	1	1 (frameshifted)	0
Paenibacillus antibioticophila	MGYG-HGUT-01451	GCA_902375095.1	0	0	1	1 (frameshifted)	0
Paenibacillus antri	SYSU K30003	GCA_005765165.1	0	0	0	1	0
Paenibacillus apiarius	NRRL B-23460	GCA_002161865.1	0	0	0	1	0
Paenibacillus aquistagni	11	GCA_900177815.1	0	1	0	1	0
Paenibacillus aquistagni	DK1	GCA_012926515.1	0	1	0	1	0
Paenibacillus assamensis	DSM 18201	GCA_000422445.1	0	0	0	1	0
Paenibacillus azotifigens	LMG 29963	GCA_008635805.1	0	0	1	1	0
Paenibacillus baekrokdamisoli	KCTC 33723	GCA_003945345.1	0	0	0	1	0
Paenibacillus barcinonensis	CECT 7022	GCA_003217495.1	0	1	0	1	0
Paenibacillus barcinonensis	KACC11450	GCA_013347305.1	0	1	0	1	0
Paenibacillus barengoltzii	G22	GCA_000403375.2	0	1	0	1	0
Paenibacillus barengoltzii	J12	GCA_900177265.1	0	0	0	1	0
Paenibacillus barengoltzii	NBRC 101215	GCA_004000745.1	0	0	0	1	0
Paenibacillus beijingensis	DSM 24997	GCA_000961095.1	0	0	0	1	0
Paenibacillus borealis	DSM 13188	GCA_000758665.1	0	0	1	1	0
Paenibacillus borealis	FSL H7-0744	GCA_001954415.1	0	0	1	1	0
Paenibacillus bouchesdurhonensis	Marseille-P3071	GCA_900155685.1	0	0	0	1	0
Paenibacillus camerounensis	G4	GCA_000723885.1	0	0	1	1	0
Paenibacillus campinasensis	3CS1	GCA_009725105.1	0	1	0	1	0
Paenibacillus campinasensis	7537-G1	GCA_002272015.1	0	1	0	1	0
Paenibacillus castaneae	DSM 19417	GCA_002884445.1	0	0	0	1	0
Paenibacillus castaneae	CECT 7279	GCA_011761405.1	0	0	0	1	0
Paenibacillus catalpae	CGMCC 1.10784	GCA_900112695.1	0	0	0	1	0
Paenibacillus cellulosilyticus	CECT 5696	GCA_003182255.1	0	0	0	1	0
Paenibacillus cellulosilyticus	KACC 14175	GCA_013347265.1	0	0	0	1	0
Paenibacillus cellulositrophicus	KACC 16577	GCA_009363095.1	0	0	0	1	0
Paenibacillus chibensis	NBRC 15958	GCA_004001045.1	0	0	0	1	0
Paenibacillus chitinolyticus	KCCM 41400	GCA_004117095.1	0	0	0	1	0
Paenibacillus chitinolyticus	NBRC 15660	GCA_000739915.1	0	0	0	1	0
Paenibacillus chondroitinus	OK414	GCA_000799595.1	0	0	0	1	0
Paenibacillus chondroitinus	NBRC 15376	GCA_004000765.1	0	1	0	1	0
Paenibacillus contaminans	CKOBP-6	GCA_003285015.1	0	0	0	1	0
Paenibacillus crassostreae	LPB0068	GCA_001857945.1	0	0	0	1	0
Paenibacillus crassostreae	LPB0068	GCA_001637335.1	0	0	0	1	0
Paenibacillus curdlanolyticus	B-6	GCA_013391865.1	0	0	0	1	0
Paenibacillus curdlanolyticus	YK9	GCA_000179615.1	0	1	0	1	0
Paenibacillus daejeonensis	DSM 15491	GCA_000378385.1	0	0	0	1	0
Paenibacillus dakarensis	FF9	GCA_001373415.1	0	0	0	1	0
Paenibacillus darwinianus	Br	GCA_000598065.1	0	0	0	1	0
Paenibacillus darwinianus	CE1	GCA_000598085.1	0	0	0	1	0
Paenibacillus darwinianus	MB1	GCA_000598105.1	0	0	0	1	0
Paenibacillus dauci	H9	GCA_000971985.1	0	0	0	1	0
Paenibacillus dendritiformis	F-A1	GCA_004358805.1	0	0	0	1	0
Paenibacillus dendritiformis	PV3-16	GCA_003243025.1	0	0	0	1	0
Paenibacillus dendritiformis	CRN 18	GCA_012272915.1	0	0	0	1	0
Paenibacillus dendritiformis	CRN 20	GCA_013266915.1	0	0	0	1	0
Paenibacillus dendritiformis	C454	GCA_000245555.2	0	0	0	1	0
Paenibacillus donghaensis	KCTC 13049	GCA_002192415.1	0	0	1	1	0
Paenibacillus durus	DSM 1735	GCA_000756615.1	0	0	1	1	0
Paenibacillus durus	ATCC 35681	GCA_000993825.1	0	0	1	1	0
Paenibacillus etheri	SH7	GCA_001012825.2	0	0	0	1	0
Paenibacillus faecis	DSM 23593	GCA_008084145.1	0	0	1	1	0
Paenibacillus favisporus	Y7	GCA_010993935.1	0	0	0	1	0
Paenibacillus ferrarius	CY1	GCA_002027705.1	0	1	0	1	0
Paenibacillus flagellatus	DXL2	GCA_003217775.1	0	0	0	1	0
Paenibacillus fonticola	DSM 21315	GCA_000381905.1	0	0	0	1	0
Paenibacillus forsythiae	T98	GCA_000520735.1	0	0	1	1	0
Paenibacillus ginsengarvi	KCTC 13059	GCA_003626695.1	0	0	0	1	0
Paenibacillus ginsengihumi	DSM 21568	GCA_000380965.1	0	0	0	1	0
Paenibacillus glacialis	DSM 22343	GCA_001637205.1	0	0	0	1	0
Paenibacillus glucanolyticus	5162	GCA_001632305.1	0	0	0	1	0
Paenibacillus glucanolyticus	W10507	GCA_003033945.1	0	0	0	1	0
Paenibacillus glucanolyticus	SLM1	GCA_001633025.1	0	0	0	1	0
Paenibacillus glucanolyticus	J12	GCA_009377295.1	0	0	0	1	0
Paenibacillus glucanolyticus	FSL R5-0817	GCA_001955865.1	0	0	0	1	0
Paenibacillus glucanolyticus	NBRC 15330	GCA_004000885.1	0	0	0	1	0
Paenibacillus glycanilyticus	NBRC 16618	GCA_004000805.1	0	0	0	1	0
Paenibacillus gorillae	G1	GCA_000513275.1	0	1	0	1	0
Paenibacillus graminis	DSM 15220	GCA_000758705.1	0	0	1	1	0
Paenibacillus graminis	RSA19	GCA_000520655.1	0	0	1	1	0
Paenibacillus guangzhouensis	KCTC 33171	GCA_009363075.1	0	0	0	1	0
Paenibacillus harenae	DSM 16969	GCA_000422465.1	0	0	0	1	0
Paenibacillus helianthi	P26E	GCA_001909055.1	0	0	1	1	0
Paenibacillus hemerocallicola	KCTC 33185	GCA_006265175.1	0	0	0	1	0
Paenibacillus herberti	R33	GCA_002233675.1	0	1	0	1	0
Paenibacillus humicus	NBRC 102415	GCA_004000905.1	0	0	0	1	0
Paenibacillus ihbetae	IHBB 9852	GCA_002741055.1	0	0	0	1	0
Paenibacillus ihbetae	IHBB 9951	GCA_001996445.1	0	0	0	1	0
Paenibacillus ihbetae	DE0024	GCA_007680505.1	0	0	0	1	0
Paenibacillus ihbetae	DE00B2	GCA_007680975.1	0	0	0	1	0
Paenibacillus ihbetae	DE0044	GCA_007680185.1	0	0	0	1	0
Paenibacillus ihbetae	DE0002	GCA_007680895.1	0	0	0	1	0
Paenibacillus ihbetae	DE00C1	GCA_007680955.1	0	0	0	1	0
Paenibacillus ihbetae	DE00B1	GCA_007680985.1	0	0	0	1	0
Paenibacillus ihbetae	DE00C2	GCA_007680905.1	0	0	0	1	0
Paenibacillus ihbetae	DE0001	GCA_007680875.1	0	0	0	1	0
Paenibacillus ihbetae	DE0004	GCA_007680865.1	0	0	0	1	0
Paenibacillus ihbetae	DE0082	GCA_007679615.1	0	0	0	1	0
Paenibacillus ihuae	GD6	GCA_001368795.1	0	0	1	1	0
Paenibacillus ihuae	MGYG-HGUT-01507	GCA_902375745.1	0	0	1	1	0
Paenibacillus ihumii	AT5	GCA_001403875.1	0	0	0	1	0
Paenibacillus ihumii	MGYG-HGUT-01514	GCA_902375655.1	0	0	0	1	0
Paenibacillus illinoisensis	E3	GCA_003224455.1	0	0	0	1	0
Paenibacillus illinoisensis	NBRC 15959	GCA_004000925.1	0	0	0	1	0
Paenibacillus jilunlii	KACC 16679	GCA_010450915.1	0	0	1	1	0
Paenibacillus jilunlii	DSM 23019	GCA_001546055.1	0	0	1	1	0
Paenibacillus jilunlii	CGMCC 1.10239	GCA_900102965.1	0	0	1	1	0
Paenibacillus kobensis	NBRC 15729	GCA_004000825.1	0	1	0	1	0
Paenibacillus koleovorans	NBRC 103111	GCA_004000845.1	0	0	0	1	0
Paenibacillus lactis	UBA11258	GCA_003445965.1	0	0	0	1	0
Paenibacillus lactis	154	GCA_000230915.2	0	0	0	1	0
Paenibacillus larvae	MEX14	GCA_000988145.1	0	0	0	1	0
Paenibacillus larvae subsp. larvae	ATCC 9545	GCA_002003265.1	0	0	0	1	0
Paenibacillus larvae subsp. larvae	ERIC_I	GCA_002951875.1	0	0	0	1	0
Paenibacillus larvae subsp. larvae	Eric_V	GCA_011220525.1	0	0	0	1	0
Paenibacillus larvae subsp. larvae	Eric_III	GCA_002951915.1	0	0	0	1	0
Paenibacillus larvae subsp. larvae	Eric_IV	GCA_002951935.1	0	0	0	1	0
Paenibacillus larvae subsp. larvae	B-3650	GCA_000187665.4	0	0	0	1	0
Paenibacillus larvae subsp. larvae	BRL-230010	GCA_000153605.1	0	0	0	1	0
Paenibacillus larvae subsp. larvae	DSM 25430	GCA_002951895.1	0	0	0	1	0
Paenibacillus larvae subsp. larvae	DSM 25719	GCA_000511115.1	0	0	0	1	0
Paenibacillus larvae subsp. pulvifaciens	SAG 10367	GCA_002082155.1	0	0	0	1	0
Paenibacillus larvae subsp. pulvifaciens	ATCC 13537	GCA_002007765.1	0	0	0	1	0
Paenibacillus larvae subsp. pulvifaciens	CCM 38	GCA_002043025.1	0	0	0	1	0
Paenibacillus lautus	E7593-69	GCA_003590055.1	0	0	0	1	0
Paenibacillus lautus	BHU3	GCA_002407025.1	0	0	0	1	0
Paenibacillus lautus	FSL F4-0100	GCA_001955975.1	0	0	0	1	0
Paenibacillus lautus	MDMC362	GCA_003269305.1	0	0	0	1	0
Paenibacillus lautus	NBRC 15380	GCA_004000945.1	0	0	0	1	0
Paenibacillus lemnae	L7-75	GCA_012933385.1	0	0	0	1	0
Paenibacillus lentus	DSM 25539	GCA_003931855.1	0	0	0	1	0
Paenibacillus lupini	CECT 8235T	GCA_011761355.1	0	0	0	1	0
Paenibacillus luteus	R-3	GCA_006542765.1	0	0	0	1	0
Paenibacillus lutimineralis	MBLB1234	GCA_003991425.1	0	0	0	1	0
Paenibacillus macerans	NCTC6355	GCA_900454495.1	0	0	1	1	0
Paenibacillus macerans	JCM 17693	GCA_003864435.1	0	0	1	1	0
Paenibacillus macerans	DSM 24746	GCA_003851105.1	0	0	1	1	0
Paenibacillus macerans	8244	GCA_000746875.1	0	0	1	1	0
Paenibacillus macerans	3CT49	GCA_009725145.1	0	0	1	1	0
Paenibacillus macerans	FSL R5-0527	GCA_001956835.1	0	0	1	1	0
Paenibacillus macerans	NBRC 15307	GCA_004000965.1	0	0	1	1	0
Paenibacillus macquariensis	ATCC 23464	GCA_900156375.1	0	0	0	1	0
Paenibacillus macquariensis subsp. defensor	JCM 14954	GCA_001637215.1	0	0	0	1	0
Paenibacillus macquariensis subsp. macquariensis	DSM 2	GCA_001637165.1	0	0	0	1	0
Paenibacillus mesophilus	SYSU K30004	GCA_005938385.1	0	0	0	1	0
Paenibacillus methanolicus	BL24	GCA_008124765.1	0	1	0	1	0
Paenibacillus montanisoli	RA17	GCA_003268025.1	0	0	0	1	0
Paenibacillus mucilaginosus	3016	GCA_000250655.1	0	1	0	1	0
Paenibacillus mucilaginosus	K02	GCA_000258535.2	0	1	0	1	0
Paenibacillus mucilaginosus	KNP414	GCA_000218915.1	0	1	0	1	0
Paenibacillus nanensis	DSM 22867	GCA_003583765.1	0	0	0	1	0
Paenibacillus naphthalenovorans	32O-Y	GCA_001465255.1	0	1	0	1	0
Paenibacillus naphthalenovorans	PR-N1	GCA_900099895.1	0	1	0	1	0
Paenibacillus naphthalenovorans	4B1	GCA_005403365.1	0	1	0	1	0
Paenibacillus nuruki	TI45-13ar	GCA_001721045.1	0	1	0	1	0
Paenibacillus odorifer	DSM 15391	GCA_000758725.1	0	0	1	1	0
Paenibacillus odorifer	CBA7130	GCA_003255855.1	0	0	1	1	0
Paenibacillus odorifer	MGYG-HGUT-02414	GCA_902386945.1	0	0	1	1	0
Paenibacillus odorifer	FSL F4-0077	GCA_001955555.1	0	0	1	1	0
Paenibacillus odorifer	FSL H3-0305	GCA_001955495.1	0	0	1	1	0
Paenibacillus odorifer	FSL R5-0636	GCA_001954375.1	0	0	1	1	0
Paenibacillus odorifer	FSL H8-0069	GCA_001954495.1	0	0	1	1	0
Paenibacillus odorifer	FSL H3-0287	GCA_001954665.1	0	0	1	1	0
Paenibacillus odorifer	FSL H8-0175	GCA_001954515.1	0	0	1	1	0
Paenibacillus odorifer	FSL F4-0085	GCA_001954455.1	0	0	1	1	0
Paenibacillus odorifer	FSL J3-0159	GCA_001954295.1	0	0	1	1	0
Paenibacillus odorifer	FSL F4-0134	GCA_001954535.1	0	0	0	1	0
Paenibacillus odorifer	FSL J3-0153	GCA_001955755.1	0	0	1	1	0
Paenibacillus odorifer	FSL H7-0918	GCA_001954615.1	0	0	1	1	0
Paenibacillus odorifer	FSL H7-0713	GCA_001954585.1	0	0	1	1	0
Paenibacillus odorifer	FSL H7-0694	GCA_001954675.1	0	0	1	1	0
Paenibacillus odorifer	FSL H7-0718	GCA_001954655.1	0	0	1	1	0
Paenibacillus odorifer	FSL H7-0604	GCA_001954365.1	0	0	1	1	0
Paenibacillus odorifer	FSL F4-0126	GCA_001955835.1	0	0	1	1	0
Paenibacillus odorifer	FSL F4-0242	GCA_001954595.1	0	0	1	1	0
Paenibacillus odorifer	FSL H3-0464	GCA_001955765.1	0	0	1	1	0
Paenibacillus odorifer	FSL H3-0465	GCA_001955775.1	0	0	1	1	0
Paenibacillus odorifer	FSL R5-0883	GCA_001954285.1	0	0	1	1	0
Paenibacillus odorifer	FSL J3-0155	GCA_001954505.1	0	0	1	1	0
Paenibacillus odorifer	FSL H8-0147	GCA_001954575.1	0	0	1	1	0
Paenibacillus odorifer	FSL F4-0152	GCA_001954345.1	0	0	1	1	0
Paenibacillus odorifer	FSL H8-0237	GCA_001955845.1	0	0	1	1	0
Paenibacillus odorifer	FSL R5-0937	GCA_001955785.1	0	0	1	1	0
Paenibacillus odorifer	VTT E-133288	GCA_002264345.1	0	0	1	1	0
Paenibacillus odorifer	FSL H7-0433	GCA_001955595.1	0	0	1	1	0
Paenibacillus odorifer	FSL H3-0280	GCA_001954335.1	0	0	1	1	0
Paenibacillus odorifer	FSL H7-0443	GCA_001955545.1	0	0	0	1	0
Paenibacillus odorifer	FSL R5-0923	GCA_001954445.1	0	0	0	1	0
Paenibacillus odorifer	FSL H7-0710	GCA_001954425.1	0	0	0	1	0
Paenibacillus oralis	KCOM 3021	GCA_003863965.1	0	1	1	1	0
Paenibacillus oryzae	1DrF-4	GCA_001675045.1	0	0	0	1	0
Paenibacillus oryzisoli	1ZS3-15	GCA_001653565.1	0	1	0	1	0
Paenibacillus pabuli	FSL F4-0087	GCA_001955985.1	0	1	0	1	0
Paenibacillus pabuli	DB-3	GCA_003182535.1	0	1	0	1	0
Paenibacillus pabuli	NG-13	GCA_003259455.1	0	1	0	1	0
Paenibacillus pabuli	NBRC 13638	GCA_001514495.1	0	0	0	1	0
Paenibacillus paeoniae	M4BSY-1	GCA_003388735.1	0	1	0	1	0
Paenibacillus panacisoli	DSM 21345	GCA_000426545.1	0	0	1	1	0
Paenibacillus paridis	py1325	GCA_006345825.1	0	0	0	1	0
Paenibacillus pasadenensis	NBRC 101214	GCA_004001085.1	0	1	0	1	0
Paenibacillus pasadenensis	R16	GCA_002864175.1	0	1	0	1	0
Paenibacillus pasadenensis	DSM 19293	GCA_000422485.1	0	1	0	1	0
Paenibacillus pectinilyticus	KCTC13222	GCA_001700435.1	0	0	0	1	0
Paenibacillus phocaensis	mt24	GCA_900021165.1	0	0	1	1	0
Paenibacillus physcomitrellae	XB	GCA_002240225.1	0	0	0	1	0
Paenibacillus pini	JCM 16418	GCA_000576305.1	0	1	0	1 (frameshifted)	0
Paenibacillus pinihumi	DSM 23905	GCA_000422505.1	0	0	0	1	0
Paenibacillus pinihumi	JCM 16419	GCA_001312305.1	0	1	0	1	0
Paenibacillus pinisoli	JCM 19203	GCA_003605435.1	0	1	0	1	0
Paenibacillus pinistramenti	ASL46	GCA_005869875.1	0	0	0	1	0
Paenibacillus piri MS74	MS74	GCA_004354045.1	0	0	0	1	0
Paenibacillus polysaccharolyticus	BL9	GCA_900102085.1	0	1	0	1	0
Paenibacillus prosopidis	CECT 7506T	GCA_003337375.1	0	0	0	1	0
Paenibacillus protaetiae	FW100M-2	GCA_004135365.1	0	0	0	1	0
Paenibacillus psychroresistens	ML311-T8	GCA_009728935.1	0	1	0	1	0
Paenibacillus rhizosphaerae	FSL R5-0378	GCA_001956185.1	0	0	0	1	0
Paenibacillus rigui	JCM 16352	GCA_002234615.1	0	1	0	1	0
Paenibacillus riograndensis	CAS34	GCA_001546065.1	0	0	1	1	0
Paenibacillus riograndensis	CAR114	GCA_001546095.1	0	0	1	1	0
Paenibacillus riograndensis	SBR5T	GCA_000981585.1	0	0	1	1	0
Paenibacillus rubinfantis	MT18	GCA_001486505.1	0	0	1	1	0
Paenibacillus rubinfantis	MGYG-HGUT-01525	GCA_902375825.1	0	0	1	1	0
Paenibacillus sabinae	T27	GCA_000612505.1	0	0	1	1	0
Paenibacillus sacheonensis	DSM 23054	GCA_009909195.1	0	0	0	1	0
Paenibacillus sambharensis	SMB1	GCA_003233845.1	0	1	0	1	0
Paenibacillus sanguinis	DSM 16941	GCA_000374825.1	0	0	0	1	0
Paenibacillus selenitireducens	ES3-24	GCA_002021565.1	0	0	0	1	0
Paenibacillus senegalensis	MGYG-HGUT-01404	GCA_902374655.1	0	0	0	1	0
Paenibacillus senegalensis	JC66T	GCA_000285515.1	0	0	0	1	0
Paenibacillus senegalimassiliensis	SIT18	GCA_001486585.1	0	1	0	1	0
Paenibacillus senegalimassiliensis	MGYG-HGUT-01526	GCA_902375865.1	0	1	0	1	0
Paenibacillus silvae	NC2	GCA_003248275.1	0	1	0	1	0
Paenibacillus sinopodophylli	CCTCC AB 2016047	GCA_005930355.1	0	0	0	1	0
Paenibacillus solani	FJAT-22460	GCA_001277345.1	0	0	0	1	0
Paenibacillus sonchi	X19-5	GCA_000316285.1	0	0	1	1	0
Paenibacillus sophorae	CGMCC 1.10238	GCA_900110315.1	0	0	1	1	0
Paenibacillus spiritus	MER_111	GCA_008710135.1	0	0	1	1	0
Paenibacillus stellifer	DSM 14472	GCA_000758685.1	0	0	1	1	0
Paenibacillus swuensis	DY6	GCA_001644605.1	0	0	0	1	0
Paenibacillus taichungensis	DB-4	GCA_003201335.1	0	0	0	1	0
Paenibacillus taichungensis	DSM 19942	GCA_013359905.1	0	0	0	1	0
Paenibacillus taichungensis	NC1	GCA_003287275.1	0	1	0	1	0
Paenibacillus taichungensis	VTT E-133285	GCA_002264305.1	0	1	0	1	0
Paenibacillus taihuensis	CGMCC 1.10966	GCA_003386535.1	0	0	0	1	0
Paenibacillus taiwanensis	DSM 18679	GCA_000425125.1	0	0	0	1	0
Paenibacillus tepidiphilus	SYSU G01001	GCA_008635795.1	0	0	1	1	0
Paenibacillus terrigena	DSM 21567	GCA_000374845.1	0	0	0	1	0
Paenibacillus thalictri	N2SHLJ1	GCA_004307995.1	0	0	0	1	0
Paenibacillus thermoaerophilus	DSM 26310	GCA_005938195.1	0	0	0	1	0
Paenibacillus thiaminolyticus	NRRL B-4156	GCA_002161855.1	0	0	0	1	0
Paenibacillus thiaminolyticus	NRRL B-4156	GCA_007066085.1	0	0	0	1	0
Paenibacillus thiaminolyticus	Mbale	GCA_007066225.2	0	0	0	1	0
Paenibacillus thiaminolyticus	NCTC11027	GCA_900454555.1	0	0	0	1	0
Paenibacillus thiaminolyticus	MGYG-HGUT-02490	GCA_902387705.1	0	0	0	1	0
Paenibacillus thiaminolyticus	BO5	GCA_003591545.1	0	0	0	1	0
Paenibacillus thiaminolyticus	NBRC 15656	GCA_004001005.1	0	0	0	1	0
Paenibacillus timonensis	12ME58	GCA_009725205.1	0	0	0	1	0
Paenibacillus tuaregi	Marseille-P2472	GCA_900086655.1	0	1	0	1	0
Paenibacillus tuaregi	MGYG-HGUT-01548	GCA_902376025.1	0	1	0	1	0
Paenibacillus typhae	CGMCC 1.11012	GCA_900099765.1	0	0	1	1	0
Paenibacillus uliginis	N3/975	GCA_900177425.1	0	0	0	1	0
Paenibacillus validus	2CS3	GCA_009725115.1	0	1	0	1	0
Paenibacillus validus	NBRC 15382	GCA_004000985.1	0	1	0	1	0
Paenibacillus vortex	V453	GCA_000193415.2	0	0	0	1	0
Paenibacillus whitsoniae	MER 54	GCA_003955665.1	0	0	0	1	0
Paenibacillus woosongensis	12CR55	GCA_009725165.1	0	0	0	1	0
Paenibacillus wynnii	DSM 18334	GCA_000757885.1	0	0	1	1	0
Paenibacillus xerothermodurans	ATCC 27380	GCA_002220865.2	0	1	0	1	0
Paenibacillus xylanexedens	EDO6	GCA_003833245.1	0	0	0	1	0
Paenibacillus xylanexedens	PAMC 22703	GCA_001908275.1	0	1	0	1	0
Paenibacillus xylanexedens	DE0117	GCA_007679255.1	0	1	0	1	0
Paenibacillus xylanexedens	DE0301	GCA_007676705.1	0	1	0	1	0
Paenibacillus xylanexedens	DE0019	GCA_007680605.1	0	0	0	1	0
Paenibacillus xylanexedens	DE0076	GCA_007679725.1	0	1	0	1	0
Paenibacillus xylanexedens	DE0389	GCA_007672995.1	0	1	0	1	0
Paenibacillus xylanexedens	DE0013	GCA_007680665.1	0	1	0	1	0
Paenibacillus xylanexedens	DE0357	GCA_007676615.1	0	1	0	1	0
Paenibacillus xylanexedens	DE0070	GCA_007679855.1	0	1	0	1	0
Paenibacillus xylanexedens	DE0049	GCA_007680105.1	0	1	0	1	0
Paenibacillus xylanexedens	DE0334	GCA_007676685.1	0	1	0	1	0
Paenibacillus xylanexedens	DE0359	GCA_007673435.1	0	1	0	1	0
Paenibacillus xylaniclasticus	NBRC 106381	GCA_004001065.1	0	0	0	1	0
Paenibacillus xylanilyticus	W4	GCA_009664365.1	0	0	0	1	0
Paenibacillus xylanilyticus	LMG 21957	GCA_013359935.1	0	0	0	1	0
Paenibacillus xylanivorans	A59	GCA_001280595.1	0	1	0	1	0
Paenibacillus yonginensis	DCY84	GCA_001685395.1	0	0	0	1	0
"Paenibacillus yunnanensis"	SYSU G01003	GCA_008973665.1	0	0	1	1	0
Paenibacillus zanthoxyli	JH29	GCA_000520715.1	0	0	1	1	0
Total number	396	396	88	99	109	396	0
ilvB (=ipdC) encodes biosynthetic-type acetolactate synthase large subunit (=indole-3-pyruvate decarboxylase)
ACC deaminase = 1-aminocyclopropane-1-carboxylate deaminase
1: presence
0: absence
